# Supplementary material for: Noncanonical GLI1 signaling promotes stemness features and in vivo growth in lung adenocarcinoma
Source: PubMed Central journal article supplement — Oncogene. 2017 Apr 3;36(32):4641–52. doi: 10.1038/onc.2017.91 (PMC5558095; doi:10.1038/onc.2017.91), 2017-04-03
Supplement: onc201791x1.pdf [file onc201791x1.pdf]

# Supplementary Figure 1

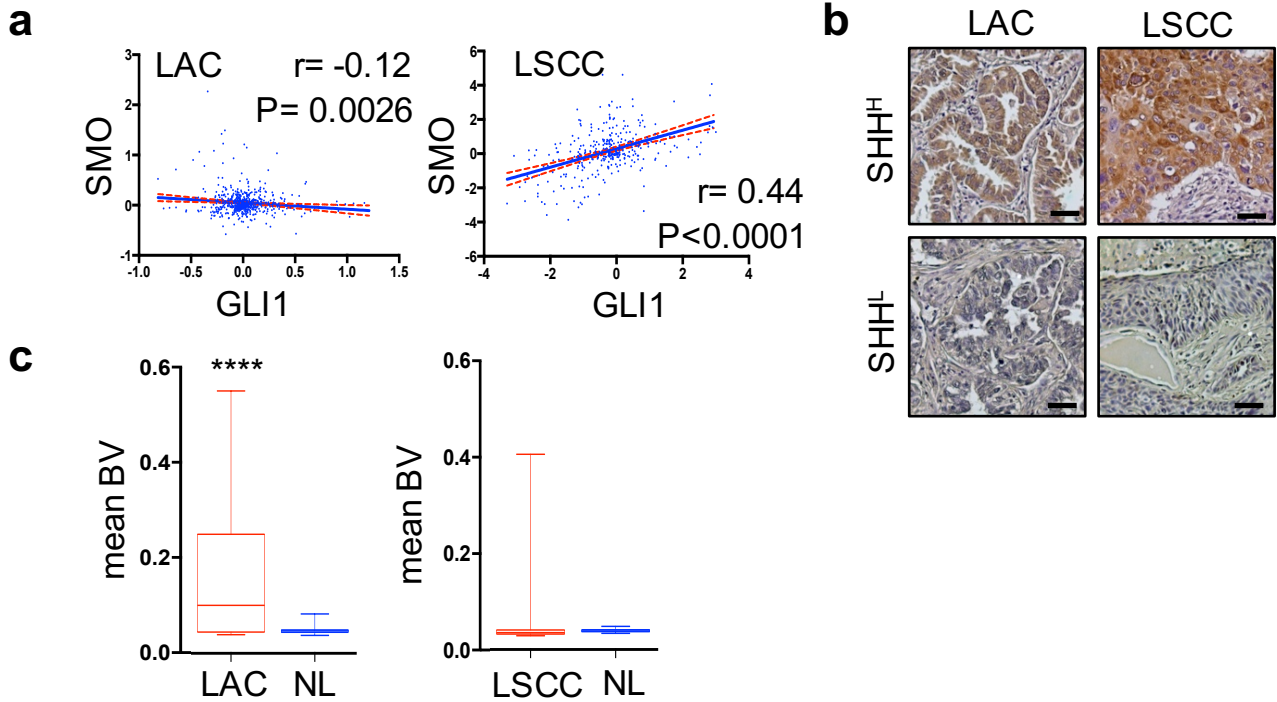

**d**

ggcaagtttatttcccagacacctgttcc**cg**caggtaacagcagccagagcagctgc**cg**tgagtg  
actctgaggt**cg**tctctctcaaaggtcc**cg**agctggaaggatttgagaag**cg**caaaccacaac  
ccaggttcttctccatggggccc**cg**ggata**cg**ttggaaaatctaaccaaaagcaggaaaaactggc  
**g**ggcctggagaa**cg**gggcagagatggaacagaagtcccc**cg**ttgacttcaggcatcccctgtcttt  
cccctctgagccaggagaaaagtc**cg**cttctctgcaga**cg**acctcagaccaagcaaggtgcc**cg**c  
**cg**agtctctccttgaggct**cg**gccc**cg**atttccactcatctctttcccc**cg**gg**cg**ggg**cg**  
**cg**ggcagg**cg**gggtcaccagatccccctagcc**cg**ggcccctccagg**cg**ccaggga**cg**ctga**cg**ctc  
**g****cg**ctcttctctct**cg**cctcccctcccacctctc**cg**ctcctt**cg**tccagtcctccccagcc  
t**cg**g**cg**cagggggg**cg**ggcttggtc**cg**g**cg**aggcc**cg**tgcattccagagagcccag**cg**agctag  
agcaaaaaggagc**cg**ggt**cg**c**cg**g**cg**gggagagtt**cg**gggggctg**cg**g**cg**gctg**cg**ggg**cg**aagg  
tggctgctgggc**cg**g**cg**ggctgg**cg**g**cg**ggg**cg**gagc**cg**gagctgact**cg**cacccc**cg**gccc**cg**g  
tctggcctccct**cg**g**cg**ggg**cg**gggaggtggctttaatggtgggagaggggaatggggctggggatt  
gggggcccaggggtctcctaGGGCTGAAGACAACCTGGATTG**CG**AGGCTAGGGCTTGGGGAGT**CG**  
TGCATCC**CG**TTC**CG**GGCCTC**CG**CAGCCCAACATGGGCC**CG**GGTTCCAAAGTTTG

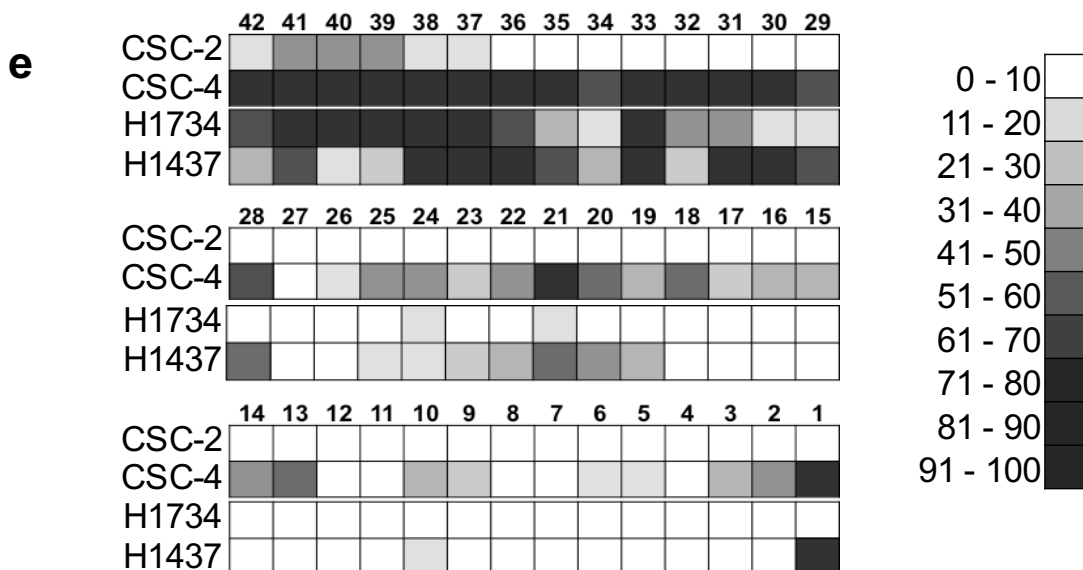

# Supplementary Figure 2

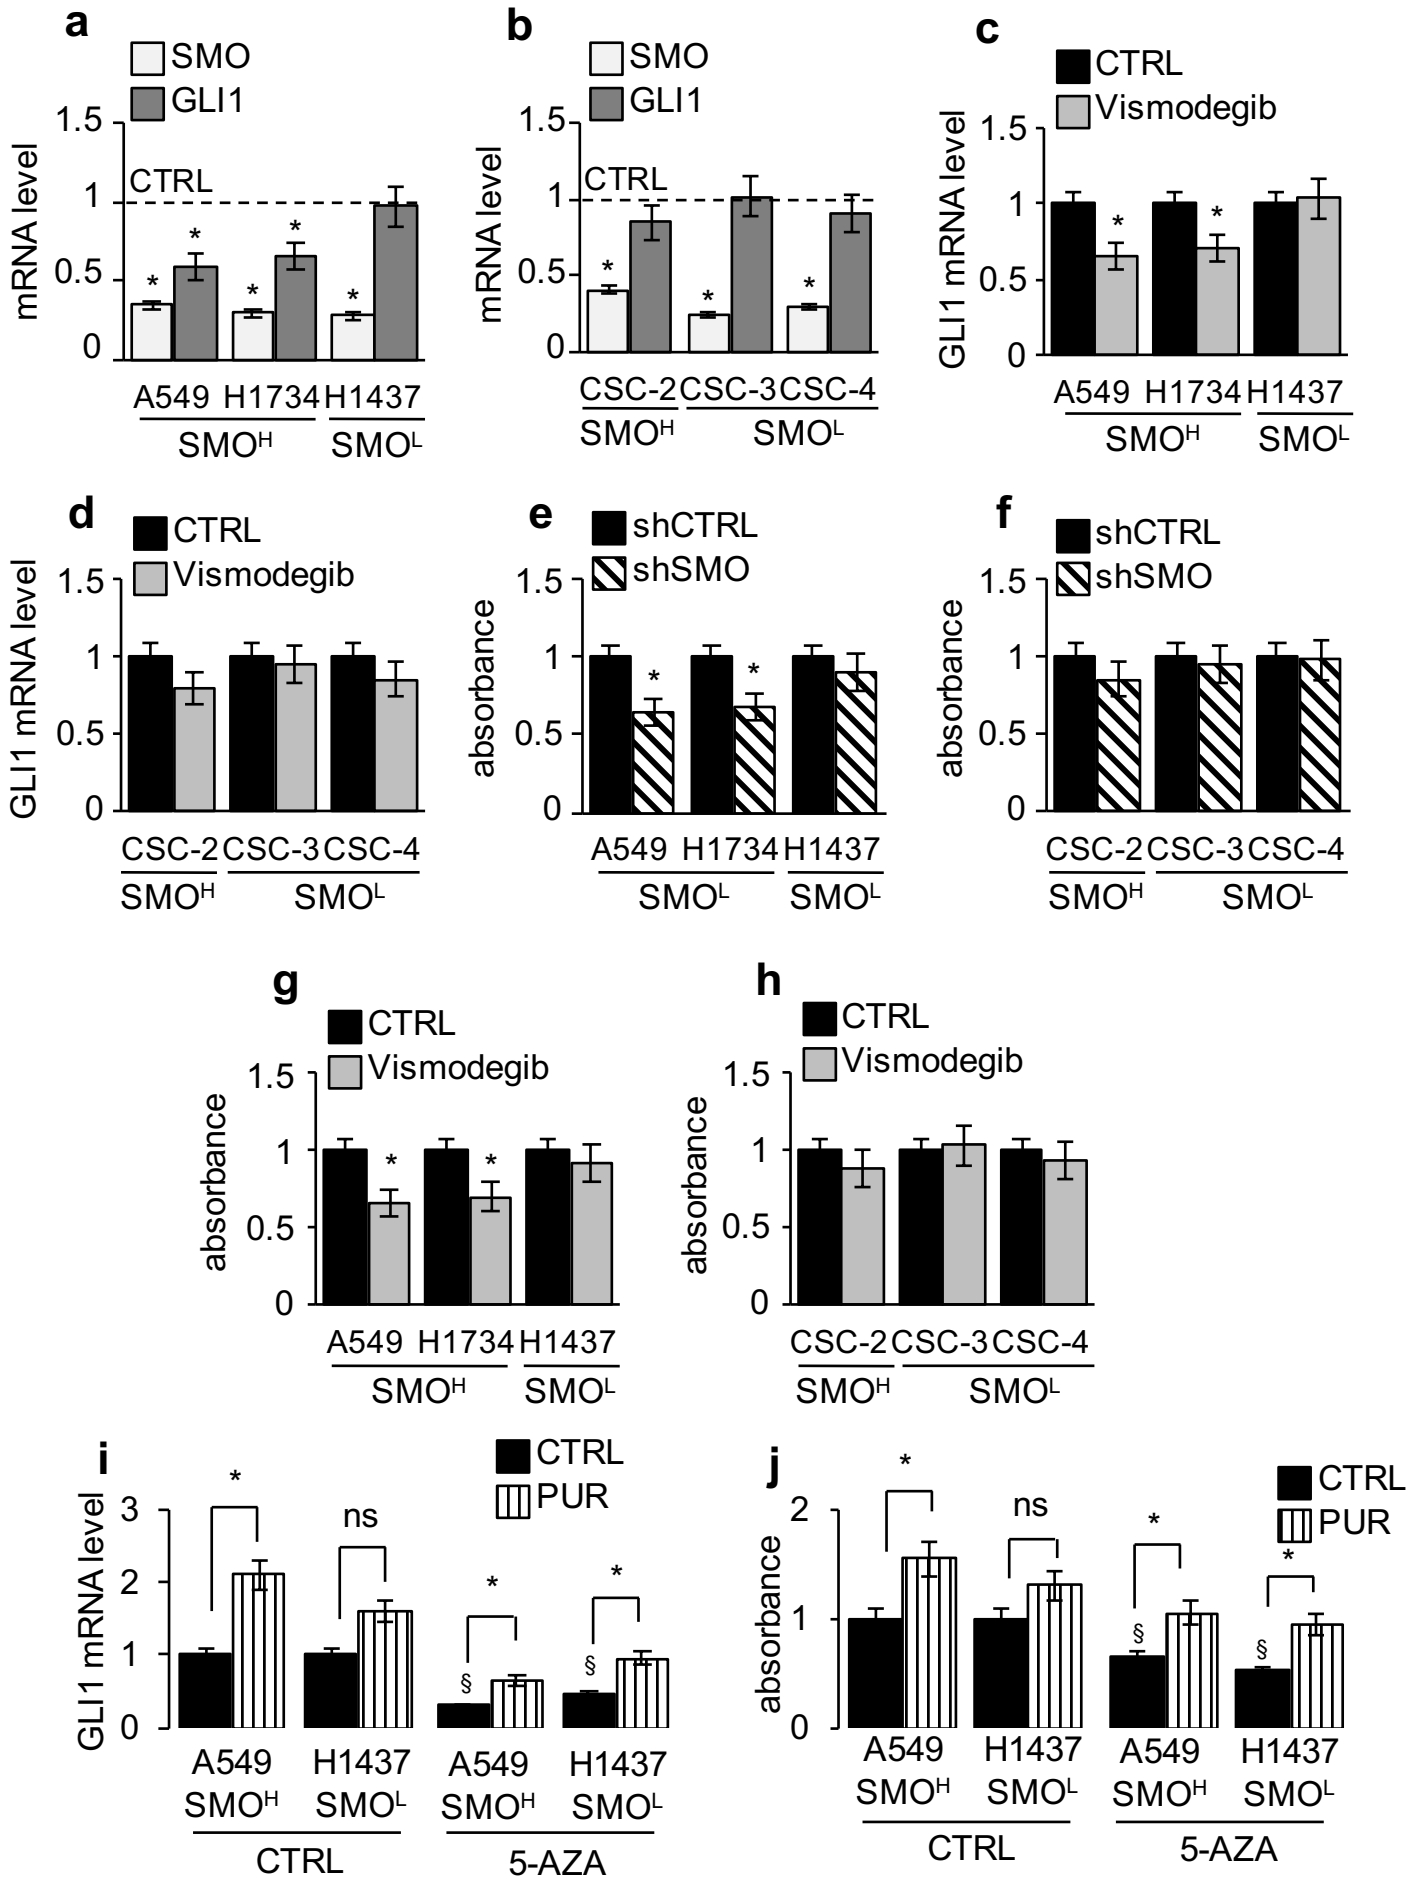

# Supplementary Figure 3

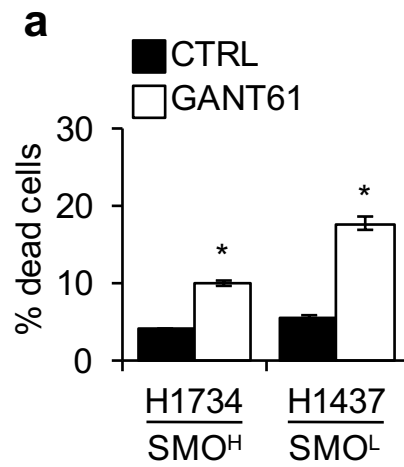

# Supplementary Figure 4

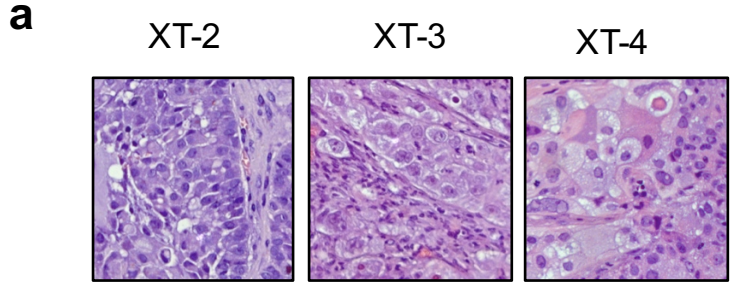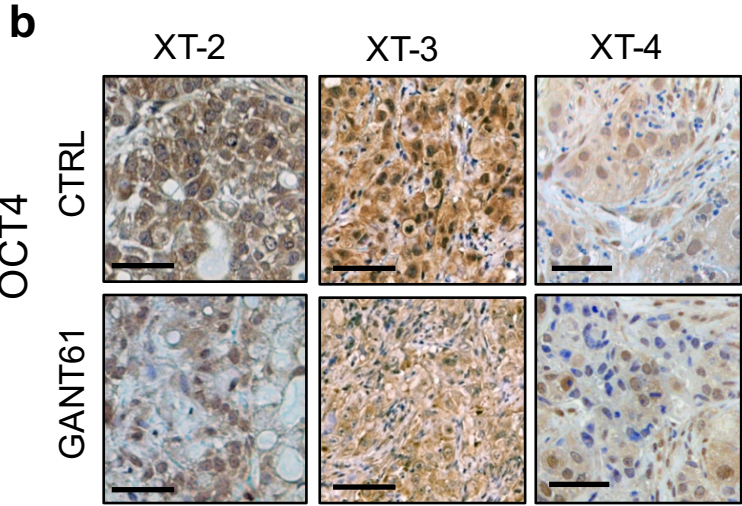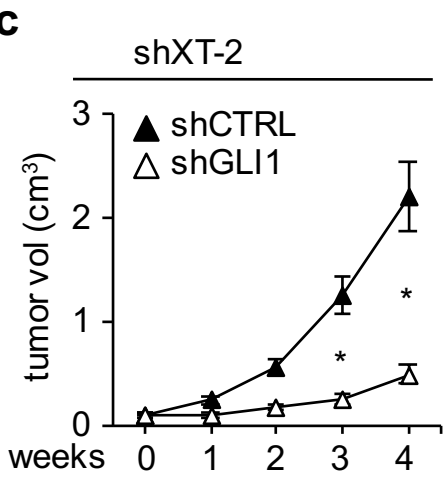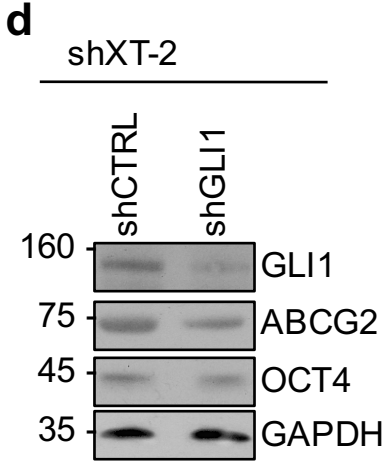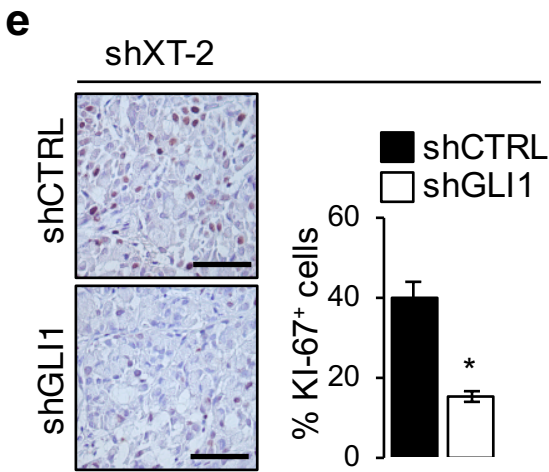

# Supplementary Figure 5

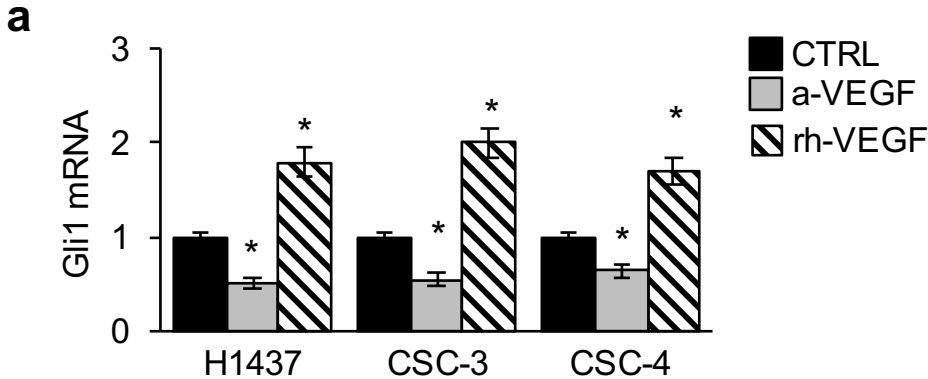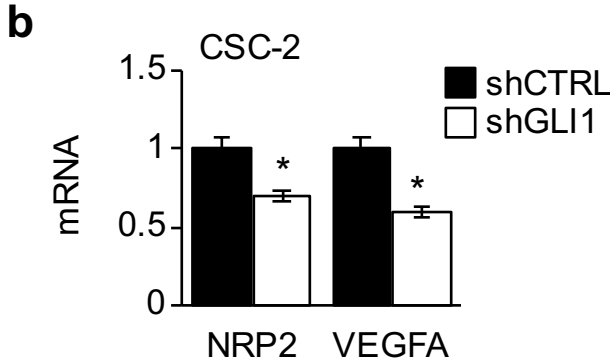

# Supplementary Figure 6

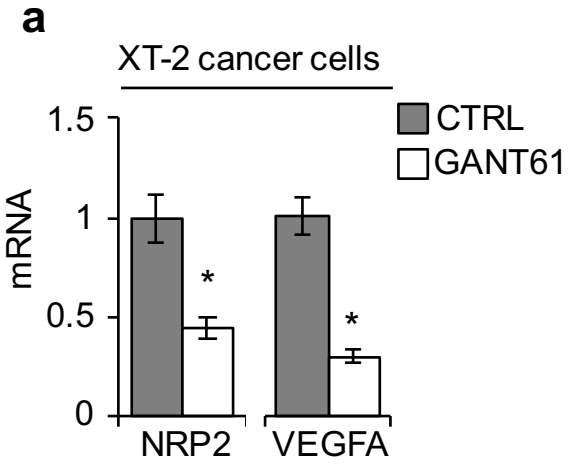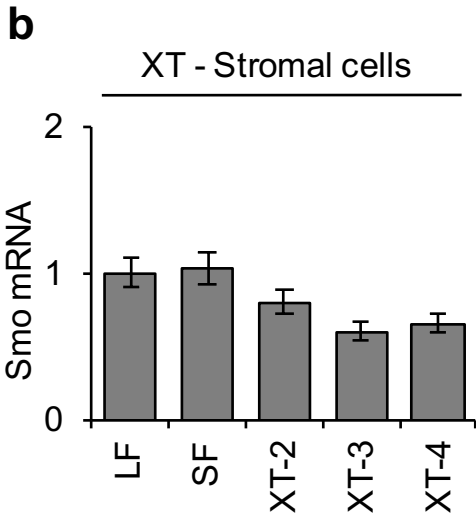

# Supplementary Table 1

## Genotype for commercial cell lines and CSC

| Cell line                  | Histotype | KRAS                  | BRAF | EGFR | EML4-ALK fusion | HER2 |
|----------------------------|-----------|-----------------------|------|------|-----------------|------|
| <b>Commercial</b>          |           |                       |      |      |                 |      |
| H1734                      | LAC       | mut c.37G>T<br>p.G13C | wt   | wt   | NO              | wt   |
| H1437                      | LAC       | wt                    | wt   | wt   | NO              | wt   |
| H520                       | LSCC      | wt                    | wt   | wt   | NO              | wt   |
| A549                       | LAC       | mut c.34G>A<br>p.G12S | wt   | wt   | NO              | wt   |
| <b>Patient-derived CSC</b> |           |                       |      |      |                 |      |
| CSC-1                      | LSCC      | wt                    | wt   | wt   | NO              | wt   |
| CSC-2                      | LAC       | mut c.34G>T<br>p.G12C | wt   | wt   | NO              | wt   |
| CSC-3                      | LAC       | wt                    | wt   | wt   | NO              | wt   |
| CSC-4                      | LAC       | wt                    | wt   | wt   | NO              | wt   |
